# Supplementary material for: Towards a Central-Eastern European EQ-5D-3L population norm: comparing data from Hungarian, Polish and Slovenian population studies
Source: Springer Nature journal article supplement (doi:10.1007/s10198-019-01071-0), 2019-05-17
Supplement: MOESM1 [file 16731594]

**Towards a Central-Eastern European EQ-5D-3L Population Norm: Comparing Data from Hungarian, Polish and Slovenian Population Studies**

Zsombor Zrubka, Dominik Golicki, Valentina Prevolnik-Rupel, Petra Baji, Fanni Rencz, Valentin Brodzsky, László Gulácsi, Márta Péntek

**Correspondence:** Zsombor Zrubka, Department of Health Economics Corvinus University of Budapest, Fővám tér 8., H-1093 Budapest, Hungary e-mail: [zsombor.zrubka@uni-corvinus.hu](mailto:zsombor.zrubka@uni-corvinus.hu) ; phone: +36-1-482-5308

**Journal:** The European Journal of Health Economics

**Supplementary Table S1**

HUNGARY

Female

|                    |           | Age group       | 18-24 | 25-34 | 35-44 | 45-54 | 55-64 | 65+   | Total |
|--------------------|-----------|-----------------|-------|-------|-------|-------|-------|-------|-------|
|                    |           | Sample N        | 207   | 376   | 315   | 311   | 182   | 31    | 1,422 |
| Dimension          | Education | Problem level   |       |       |       |       |       |       |       |
| Mobility           | Low       | Any problems    | 0,0%  | 25,0% | 50,0% | 62,5% | 66,7% |       | 44,4% |
|                    |           | Severe problems | 0,0%  | 0,0%  | 0,0%  | 0,0%  | 0,0%  |       | 0,0%  |
|                    | Middle    | Any problems    | 9,6%  | 8,0%  | 16,7% | 33,1% | 52,4% | 46,7% | 23,5% |
|                    |           | Severe problems | 0,0%  | 0,0%  | 0,0%  | 0,0%  | 0,0%  | 0,0%  | 0,0%  |
|                    | High      | Any problems    | 3,1%  | 7,7%  | 11,5% | 29,4% | 18,7% | 43,8% | 13,8% |
|                    |           | Severe problems | 0,0%  | 0,0%  | 0,7%  | 0,7%  | 0,0%  | 0,0%  | 0,3%  |
| Self-care          | Low       | Any problems    | 0,0%  | 25,0% | 25,0% | 12,5% | 11,1% |       | 13,9% |
|                    |           | Severe problems | 0,0%  | 0,0%  | 0,0%  | 0,0%  | 0,0%  |       | 0,0%  |
|                    | Middle    | Any problems    | 1,4%  | 0,7%  | 0,0%  | 3,8%  | 7,3%  | 0,0%  | 2,2%  |
|                    |           | Severe problems | 0,0%  | 0,0%  | 0,0%  | 0,0%  | 0,0%  | 0,0%  | 0,0%  |
|                    | High      | Any problems    | 0,0%  | 0,4%  | 0,7%  | 2,8%  | 0,0%  | 6,2%  | 0,9%  |
|                    |           | Severe problems | 0,0%  | 0,0%  | 0,7%  | 0,0%  | 0,0%  | 0,0%  | 0,1%  |
| Usual activities   | Low       | Any problems    | 0,0%  | 25,0% | 37,5% | 50,0% | 44,4% |       | 33,3% |
|                    |           | Severe problems | 0,0%  | 0,0%  | 0,0%  | 0,0%  | 11,1% |       | 2,8%  |
|                    | Middle    | Any problems    | 5,5%  | 5,1%  | 7,1%  | 18,8% | 36,6% | 6,7%  | 13,2% |
|                    |           | Severe problems | 0,0%  | 0,0%  | 0,0%  | 0,6%  | 0,0%  | 0,0%  | 0,2%  |
|                    | High      | Any problems    | 3,1%  | 3,8%  | 7,9%  | 11,2% | 13,2% | 6,2%  | 7,1%  |
|                    |           | Severe problems | 0,0%  | 0,0%  | 0,7%  | 2,1%  | 0,0%  | 0,0%  | 0,5%  |
| Pain/discomfort    | Low       | Any problems    | 57,1% | 75,0% | 87,5% | 87,5% | 77,8% |       | 77,8% |
|                    |           | Severe problems | 0,0%  | 0,0%  | 12,5% | 0,0%  | 11,1% |       | 5,6%  |
|                    | Middle    | Any problems    | 39,7% | 35,0% | 38,7% | 58,1% | 61,0% | 73,3% | 46,6% |
|                    |           | Severe problems | 1,4%  | 0,7%  | 1,2%  | 5,0%  | 8,5%  | 0,0%  | 3,0%  |
|                    | High      | Any problems    | 26,8% | 25,1% | 30,2% | 34,3% | 38,5% | 62,5% | 30,5% |
|                    |           | Severe problems | 0,0%  | 0,0%  | 1,4%  | 2,1%  | 2,2%  | 0,0%  | 0,9%  |
| Anxiety/depression | Low       | Any problems    | 42,9% | 50,0% | 75,0% | 87,5% | 55,6% |       | 63,9% |
|                    |           | Severe problems | 0,0%  | 0,0%  | 12,5% | 12,5% | 11,1% |       | 8,3%  |
|                    | Middle    | Any problems    | 27,4% | 46,0% | 39,3% | 45,0% | 50,0% | 33,3% | 42,0% |
|                    |           | Severe problems | 4,1%  | 3,6%  | 2,4%  | 7,5%  | 4,9%  | 13,3% | 4,7%  |
|                    | High      | Any problems    | 22,8% | 31,1% | 30,9% | 32,9% | 24,2% | 25,0% | 29,0% |
|                    |           | Severe problems | 1,6%  | 0,9%  | 2,2%  | 3,5%  | 0,0%  | 0,0%  | 1,6%  |

**Supplementary Table S1 contd.**

| HUNGARY            |           |                 | Age group | 18-24  | 25-34  | 35-44 | 45-54  | 55-64 | 65+ | Total |
|--------------------|-----------|-----------------|-----------|--------|--------|-------|--------|-------|-----|-------|
| Male               |           |                 | Sample N  | 90     | 190    | 183   | 198    | 155   | 43  | 859   |
| Dimension          | Education | Problem level   |           |        |        |       |        |       |     |       |
| Mobility           | Low       | Any problems    | 50,0%     | 0,0%   | 100,0% | 0,0%  | 0,0%   |       |     | 40,4% |
|                    |           | Severe problems | 0,0%      | 0,0%   | 33,3%  | 0,0%  | 0,0%   |       |     | 8,6%  |
|                    | Middle    | Any problems    | 0,0%      | 5,7%   | 16,0%  | 27,0% | 32,6%  | 47,2% |     | 20,5% |
|                    |           | Severe problems | 0,0%      | 0,0%   | 1,1%   | 0,0%  | 2,3%   | 0,0%  |     | 0,6%  |
|                    | High      | Any problems    | 5,8%      | 5,0%   | 11,6%  | 23,5% | 29,7%  | 28,1% |     | 14,5% |
|                    |           | Severe problems | 0,0%      | 0,8%   | 0,0%   | 0,0%  | 0,9%   | 0,0%  |     | 0,4%  |
| Self-care          | Low       | Any problems    | 50,0%     | 0,0%   | 33,3%  | 0,0%  | 0,0%   |       |     | 23,1% |
|                    |           | Severe problems | 0,0%      | 0,0%   | 0,0%   | 0,0%  | 0,0%   |       |     | 0,0%  |
|                    | Middle    | Any problems    | 0,0%      | 0,0%   | 2,1%   | 3,6%  | 4,7%   | 36,6% |     | 6,6%  |
|                    |           | Severe problems | 0,0%      | 0,0%   | 1,1%   | 0,0%  | 0,0%   | 0,0%  |     | 0,2%  |
|                    | High      | Any problems    | 0,0%      | 0,8%   | 0,0%   | 3,5%  | 2,7%   | 2,0%  |     | 1,3%  |
|                    |           | Severe problems | 0,0%      | 0,0%   | 0,0%   | 0,0%  | 0,0%   | 0,0%  |     | 0,0%  |
| Usual activities   | Low       | Any problems    | 0,0%      | 0,0%   | 66,7%  | 0,0%  | 0,0%   |       |     | 17,2% |
|                    |           | Severe problems | 0,0%      | 0,0%   | 0,0%   | 0,0%  | 0,0%   |       |     | 0,0%  |
|                    | Middle    | Any problems    | 2,8%      | 2,9%   | 6,4%   | 13,5% | 16,3%  | 41,9% |     | 12,7% |
|                    |           | Severe problems | 0,0%      | 0,0%   | 1,1%   | 0,0%  | 0,0%   | 0,0%  |     | 0,2%  |
|                    | High      | Any problems    | 5,8%      | 2,5%   | 4,7%   | 7,1%  | 13,5%  | 4,1%  |     | 5,4%  |
|                    |           | Severe problems | 0,0%      | 0,0%   | 0,0%   | 0,0%  | 0,9%   | 0,0%  |     | 0,1%  |
| Pain/discomfort    | Low       | Any problems    | 0,0%      | 100,0% | 100,0% | 0,0%  | 100,0% |       |     | 48,5% |
|                    |           | Severe problems | 0,0%      | 0,0%   | 0,0%   | 0,0%  | 0,0%   |       |     | 0,0%  |
|                    | Middle    | Any problems    | 27,8%     | 12,9%  | 35,1%  | 47,7% | 58,1%  | 63,0% |     | 39,7% |
|                    |           | Severe problems | 0,0%      | 0,0%   | 0,0%   | 2,7%  | 2,3%   | 36,6% |     | 5,6%  |
|                    | High      | Any problems    | 17,3%     | 16,0%  | 15,1%  | 37,6% | 44,1%  | 34,2% |     | 24,5% |
|                    |           | Severe problems | 0,0%      | 0,0%   | 1,2%   | 2,4%  | 2,7%   | 2,0%  |     | 1,1%  |
| Anxiety/depression | Low       | Any problems    | 0,0%      | 0,0%   | 66,7%  | 50,0% | 0,0%   |       |     | 28,5% |
|                    |           | Severe problems | 0,0%      | 0,0%   | 33,3%  | 0,0%  | 0,0%   |       |     | 8,6%  |
|                    | Middle    | Any problems    | 27,8%     | 18,6%  | 29,8%  | 31,5% | 30,2%  | 41,9% |     | 29,4% |
|                    |           | Severe problems | 2,8%      | 1,4%   | 3,2%   | 2,7%  | 2,3%   | 0,0%  |     | 2,2%  |
|                    | High      | Any problems    | 23,1%     | 17,6%  | 22,1%  | 20,0% | 27,9%  | 12,2% |     | 20,0% |
|                    |           | Severe problems | 1,9%      | 0,0%   | 2,3%   | 0,0%  | 4,5%   | 0,0%  |     | 1,2%  |

**Supplementary Table S1 contd.**

| POLAND             |           |                 | Age group | 18-24 | 25-34 | 35-44 | 45-54 | 55-64 | 65+   | Total |
|--------------------|-----------|-----------------|-----------|-------|-------|-------|-------|-------|-------|-------|
| Female             |           |                 | Sample N  | 218   | 304   | 348   | 316   | 416   | 491   | 2,093 |
| Dimensions         | Education | Problem levels  |           |       |       |       |       |       |       |       |
| Mobility           | Low       | Any problems    | 0,0%      | 40,0% | 19,0% | 20,7% | 40,3% | 62,7% | 51,2% |       |
|                    |           | Severe problems | 0,0%      | 0,0%  | 0,0%  | 0,0%  | 0,0%  | 2,4%  | 1,5%  |       |
|                    | Middle    | Any problems    | 4,8%      | 6,6%  | 6,4%  | 19,0% | 30,9% | 58,5% | 23,4% |       |
|                    |           | Severe problems | 0,0%      | 0,0%  | 0,0%  | 1,5%  | 0,0%  | 1,9%  | 0,6%  |       |
|                    | High      | Any problems    | 3,6%      | 2,8%  | 7,8%  | 14,9% | 29,9% | 52,2% | 15,3% |       |
|                    |           | Severe problems | 0,0%      | 0,0%  | 0,0%  | 1,1%  | 1,1%  | 0,0%  | 0,3%  |       |
| Self-care          | Low       | Any problems    | 0,0%      | 20,0% | 9,5%  | 10,3% | 14,9% | 36,8% | 28,0% |       |
|                    |           | Severe problems | 0,0%      | 0,0%  | 0,0%  | 0,0%  | 0,0%  | 3,3%  | 2,1%  |       |
|                    | Middle    | Any problems    | 2,1%      | 0,8%  | 1,2%  | 6,0%  | 12,2% | 21,2% | 8,3%  |       |
|                    |           | Severe problems | 0,0%      | 0,0%  | 0,0%  | 1,5%  | 0,0%  | 1,9%  | 0,6%  |       |
|                    | High      | Any problems    | 0,0%      | 0,6%  | 1,3%  | 5,7%  | 9,2%  | 16,4% | 4,5%  |       |
|                    |           | Severe problems | 0,0%      | 0,0%  | 0,0%  | 0,0%  | 1,1%  | 0,0%  | 0,2%  |       |
| Usual activities   | Low       | Any problems    | 100,0%    | 40,0% | 9,5%  | 24,1% | 34,3% | 56,1% | 46,1% |       |
|                    |           | Severe problems | 0,0%      | 0,0%  | 0,0%  | 0,0%  | 0,0%  | 7,1%  | 4,5%  |       |
|                    | Middle    | Any problems    | 5,3%      | 5,7%  | 8,1%  | 18,5% | 24,8% | 42,0% | 19,2% |       |
|                    |           | Severe problems | 0,5%      | 0,0%  | 1,7%  | 2,0%  | 1,1%  | 4,2%  | 1,7%  |       |
|                    | High      | Any problems    | 0,0%      | 2,8%  | 5,2%  | 16,1% | 18,4% | 35,8% | 11,2% |       |
|                    |           | Severe problems | 0,0%      | 0,0%  | 0,0%  | 0,0%  | 2,3%  | 1,5%  | 0,5%  |       |
| Pain/discomfort    | Low       | Any problems    | 50,0%     | 60,0% | 47,6% | 58,6% | 68,7% | 81,1% | 74,1% |       |
|                    |           | Severe problems | 0,0%      | 0,0%  | 4,8%  | 0,0%  | 4,5%  | 11,8% | 8,6%  |       |
|                    | Middle    | Any problems    | 19,1%     | 28,7% | 35,3% | 53,5% | 59,2% | 82,1% | 49,1% |       |
|                    |           | Severe problems | 0,5%      | 0,0%  | 0,0%  | 3,5%  | 2,3%  | 8,0%  | 2,7%  |       |
|                    | High      | Any problems    | 14,3%     | 22,0% | 29,9% | 40,2% | 59,8% | 74,6% | 37,7% |       |
|                    |           | Severe problems | 0,0%      | 0,0%  | 0,0%  | 1,1%  | 1,1%  | 4,5%  | 0,8%  |       |
| Anxiety/depression | Low       | Any problems    | 100,0%    | 80,0% | 57,1% | 48,3% | 52,2% | 60,8% | 58,3% |       |
|                    |           | Severe problems | 0,0%      | 0,0%  | 4,8%  | 0,0%  | 0,0%  | 6,1%  | 4,2%  |       |
|                    | Middle    | Any problems    | 19,7%     | 19,7% | 24,3% | 43,0% | 40,8% | 52,4% | 35,2% |       |
|                    |           | Severe problems | 0,5%      | 1,6%  | 0,0%  | 2,5%  | 1,5%  | 2,8%  | 1,6%  |       |
|                    | High      | Any problems    | 17,9%     | 16,9% | 19,5% | 29,9% | 40,2% | 49,3% | 26,5% |       |
|                    |           | Severe problems | 0,0%      | 0,0%  | 0,0%  | 1,1%  | 1,1%  | 0,0%  | 0,3%  |       |

**Supplementary Table S1 contd.**

| POLAND             |           |                 | Age group | 18-24 | 25-34 | 35-44 | 45-54 | 55-64 | 65+   | Total |
|--------------------|-----------|-----------------|-----------|-------|-------|-------|-------|-------|-------|-------|
| Male               |           |                 | Sample N  | 238   | 309   | 299   | 294   | 377   | 327   | 1,844 |
| Dimensions         | Education | Problem levels  |           |       |       |       |       |       |       |       |
| Mobility           | Low       | Any problems    | 0,0%      | 18,2% | 4,2%  | 15,0% | 50,9% | 64,9% | 43,2% |       |
|                    |           | Severe problems | 0,0%      | 0,0%  | 0,0%  | 0,0%  | 1,9%  | 3,1%  | 1,8%  |       |
|                    | Middle    | Any problems    | 3,2%      | 3,7%  | 6,6%  | 17,2% | 33,8% | 52,6% | 17,9% |       |
|                    |           | Severe problems | 0,0%      | 0,0%  | 0,0%  | 0,5%  | 0,4%  | 2,3%  | 0,4%  |       |
|                    | High      | Any problems    | 0,0%      | 7,4%  | 2,5%  | 7,5%  | 23,0% | 32,1% | 12,2% |       |
|                    |           | Severe problems | 0,0%      | 0,0%  | 0,0%  | 0,0%  | 1,6%  | 0,0%  | 0,2%  |       |
| Self-care          | Low       | Any problems    | 0,0%      | 9,1%  | 4,2%  | 5,0%  | 26,4% | 37,5% | 24,0% |       |
|                    |           | Severe problems | 0,0%      | 0,0%  | 0,0%  | 0,0%  | 3,8%  | 2,3%  | 1,8%  |       |
|                    | Middle    | Any problems    | 0,5%      | 0,5%  | 3,1%  | 4,1%  | 14,1% | 22,8% | 6,8%  |       |
|                    |           | Severe problems | 0,0%      | 0,0%  | 0,5%  | 0,5%  | 0,8%  | 3,4%  | 0,7%  |       |
|                    | High      | Any problems    | 0,0%      | 1,9%  | 1,3%  | 3,8%  | 6,6%  | 9,4%  | 3,8%  |       |
|                    |           | Severe problems | 0,0%      | 0,0%  | 0,0%  | 0,0%  | 1,6%  | 0,0%  | 0,2%  |       |
| Usual activities   | Low       | Any problems    | 25,0%     | 0,0%  | 8,3%  | 15,0% | 45,3% | 55,7% | 38,3% |       |
|                    |           | Severe problems | 0,0%      | 0,0%  | 0,0%  | 0,0%  | 5,7%  | 4,6%  | 3,2%  |       |
|                    | Middle    | Any problems    | 3,6%      | 4,7%  | 11,2% | 12,7% | 25,5% | 40,7% | 15,4% |       |
|                    |           | Severe problems | 0,0%      | 0,0%  | 1,0%  | 0,9%  | 2,3%  | 3,9%  | 1,2%  |       |
|                    | High      | Any problems    | 0,0%      | 3,7%  | 2,5%  | 9,4%  | 13,1% | 18,9% | 7,8%  |       |
|                    |           | Severe problems | 0,0%      | 0,0%  | 0,0%  | 1,9%  | 3,3%  | 0,0%  | 0,8%  |       |
| Pain/discomfort    | Low       | Any problems    | 12,5%     | 9,1%  | 37,5% | 50,0% | 69,8% | 86,4% | 64,0% |       |
|                    |           | Severe problems | 0,0%      | 0,0%  | 0,0%  | 5,0%  | 9,4%  | 6,3%  | 5,3%  |       |
|                    | Middle    | Any problems    | 11,7%     | 18,4% | 28,6% | 47,5% | 60,8% | 72,0% | 38,6% |       |
|                    |           | Severe problems | 0,0%      | 0,5%  | 1,0%  | 0,5%  | 3,0%  | 3,5%  | 1,3%  |       |
|                    | High      | Any problems    | 12,5%     | 13,9% | 24,1% | 26,4% | 52,5% | 63,9% | 30,6% |       |
|                    |           | Severe problems | 0,0%      | 0,9%  | 0,0%  | 1,9%  | 4,9%  | 1,6%  | 1,5%  |       |
| Anxiety/depression | Low       | Any problems    | 25,0%     | 27,3% | 16,7% | 35,0% | 52,8% | 56,6% | 45,4% |       |
|                    |           | Severe problems | 0,0%      | 9,1%  | 0,0%  | 0,0%  | 3,8%  | 3,1%  | 2,9%  |       |
|                    | Middle    | Any problems    | 10,4%     | 13,7% | 26,5% | 32,6% | 41,1% | 50,3% | 28,4% |       |
|                    |           | Severe problems | 0,5%      | 0,0%  | 0,5%  | 1,8%  | 1,5%  | 2,2%  | 1,0%  |       |
|                    | High      | Any problems    | 25,0%     | 16,7% | 15,2% | 26,4% | 39,3% | 32,7% | 23,7% |       |
|                    |           | Severe problems | 12,5%     | 0,0%  | 0,0%  | 0,0%  | 3,3%  | 0,0%  | 0,8%  |       |
