# Supplementary material for: Towards a Central-Eastern European EQ-5D-3L population norm: comparing data from Hungarian, Polish and Slovenian population studies
Source: Springer Nature journal article supplement (doi:10.1007/s10198-019-01071-0), 2019-05-17
Supplement: MOESM3 [file 16731594]

**Towards a Central-Eastern European EQ-5D-3L Population Norm: Comparing Data from Hungarian, Polish and Slovenian Population Studies**

Zsombor Zrubka, Dominik Golicki, Valentina Prevolnik-Rupel, Petra Baji, Fanni Rencz, Valentin Brodzsky, László Gulácsi, Márta Péntek

**Correspondence:** Zsombor Zrubka, Department of Health Economics Corvinus University of Budapest, Fővám tér 8., H-1093 Budapest, Hungary e-mail: [zsombor.zrubka@uni-corvinus.hu](mailto:zsombor.zrubka@uni-corvinus.hu) ; phone: +36-1-482-5308

**Journal:** The European Journal of Health Economics

**Supplementary Table S3 Effect of education, gender and age on health problems, EQ-5D-3L index scores and EQ VAS scores**

|                        |          | Any problems         |                      |                    |                     |                      | EQ-5D-3L index scores by different value-sets |                     |                     |                     | EQ VAS              |                     |         |
|------------------------|----------|----------------------|----------------------|--------------------|---------------------|----------------------|-----------------------------------------------|---------------------|---------------------|---------------------|---------------------|---------------------|---------|
|                        |          | Mobility             | Self-Care            | Usual Activities   | Pain / Discomfort   | Anxiety / Depression | Polish TTO                                    | UK TTO              | Slovenian VAS       | European VAS        |                     |                     |         |
| Education <sup>f</sup> | Hungary  | Middle <sup>a</sup>  | -0.221*              | -0.133*            | -0.180*             | -0.280*              | -0.195*                                       | 0.084*              | 0.148*              | 0.158*              | 0.137*              | 12.374*             |         |
|                        |          | High <sup>a</sup>    | -0.273*              | -0.143*            | -0.223*             | -0.407*              | -0.292*                                       | 0.112*              | 0.198*              | 0.212*              | 0.184*              | 17.751*             |         |
|                        | Poland   | Low <sup>b</sup>     | 0.142                | 0.153              | 0.288               | -0.018               | 0.162                                         | -0.014              | -0.002              | -0.079              | -0.028              | 0.326               |         |
|                        |          | Middle <sup>b</sup>  | 0.293                | 0.197              | 0.359*              | 0.206                | 0.257                                         | -0.055              | -0.089              | -0.175              | -0.110              | -6.620              |         |
|                        | Slovenia | High <sup>b</sup>    | 0.300                | 0.182              | 0.341*              | 0.263                | 0.304*                                        | -0.062              | -0.105              | -0.190              | -0.126              | -8.541              |         |
|                        |          | Low <sup>b</sup>     | 0.225                | 0.221              | 0.337               | -0.069               | 0.004                                         | 0.041 <sup>e</sup>  | 0.062               | -0.062              | 0.008               | 0.000               |         |
|                        |          | Middle <sup>b</sup>  | 0.167                | 0.156              | 0.288               | 0.065                | 0.065 <sup>e</sup>                            | 0.069 <sup>e</sup>  | -0.073 <sup>e</sup> | 0.003 <sup>e</sup>  | 3.417 <sup>e</sup>  |                     |         |
|                        |          | High <sup>b</sup>    | 0.122                | 0.108              | 0.157               | 0.058 <sup>e</sup>   | 0.076 <sup>e</sup>                            | 0.078 <sup>e</sup>  | -0.051 <sup>e</sup> | 0.013 <sup>e</sup>  | 2.443 <sup>e</sup>  |                     |         |
| Gender <sup>g</sup>    | Hungary  | Female <sup>c</sup>  | 0.033*               | -0.003             | 0.033*              | 0.082*               | 0.110*                                        | -0.021*             | -0.037*             | -0.043*             | -0.038*             | -0.328              |         |
|                        | Poland   | Male <sup>b</sup>    | 0.011                | -0.007             | 0.011               | 0.022                | 0.061*                                        | -0.008              | -0.015              | -0.017              | -0.016              | 0.787               |         |
|                        | Slovenia | Female <sup>b</sup>  | 0.000                | 0.000              | 0.000               | 0.000                | 0.000                                         | 0.000               | 0.000               | 0.000               | 0.000               | 0.000               |         |
|                        |          | Male <sup>b</sup>    | 0.066                | -0.009             | 0.040               | 0.044                | 0.079                                         | -0.025*             | -0.037*             | -0.043*             | -0.035*             | -1.731              |         |
|                        |          | Female <sup>b</sup>  | 0.000                | 0.000              | 0.000               | 0.000                | 0.000                                         | 0.000               | 0.000               | 0.000               | 0.000               |                     |         |
| Age group <sup>h</sup> | Hungary  | 25-34 y <sup>d</sup> | 0.027                | 0.003              | 0.004               | -0.032               | 0.065*                                        | -0.001              | -0.002              | -0.010              | -0.006              | 0.086               |         |
|                        |          | 35-44 y <sup>d</sup> | 0.098*               | 0.005              | 0.033               | 0.026                | 0.074*                                        | -0.021*             | -0.031*             | -0.046*             | -0.032*             | -2.496*             |         |
|                        |          | 45-54 y <sup>d</sup> | 0.241*               | 0.028*             | 0.097*              | 0.160*               | 0.099*                                        | -0.056*             | -0.087*             | -0.114*             | -0.082*             | -9.374*             |         |
|                        |          | 55-64 y <sup>d</sup> | 0.290*               | 0.028*             | 0.166*              | 0.219*               | 0.100*                                        | -0.073*             | -0.107*             | -0.143*             | -0.101*             | -8.526*             |         |
|                        |          | 65-74 y <sup>d</sup> | 0.318*               | 0.026              | 0.048               | 0.271*               | 0.022                                         | -0.057*             | -0.096*             | -0.139*             | -0.094*             | -10.789*            |         |
|                        |          | 75+ y <sup>d</sup>   | 0.311                | 0.163              | 0.152               | 0.271                | -0.012                                        | -0.125              | -0.173              | -0.155              | -0.136              | -19.918*            |         |
|                        | Poland   | 18-24 y <sup>b</sup> | -0.327               | -0.191             | -0.368*             | -0.401*              | -0.409*                                       | 0.090               | 0.157               | 0.248*              | 0.180               | 9.556               |         |
|                        |          | 25-34 y <sup>b</sup> | -0.322               | -0.185             | -0.354*             | -0.286               | -0.440*                                       | 0.077               | 0.135               | 0.229*              | 0.161               | 5.893               |         |
|                        |          | 35-44 y <sup>b</sup> | -0.388*              | -0.183             | -0.361*             | -0.255               | -0.398*                                       | 0.083               | 0.137               | 0.231*              | 0.156               | 5.809               |         |
|                        |          | 45-54 y <sup>b</sup> | -0.437*              | -0.180             | -0.357*             | -0.236               | -0.305*                                       | 0.080               | 0.132               | 0.227               | 0.150               | 6.588               |         |
|                        |          | 55-64 y <sup>b</sup> | -0.327               | -0.107             | -0.335*             | -0.166               | -0.250                                        | 0.059               | 0.093               | 0.174               | 0.108               | -0.269              |         |
|                        |          | 65-74 y <sup>b</sup> | -0.234               | -0.091             | -0.160              | -0.114               | -0.141                                        | 0.006               | 0.029               | 0.108               | 0.056               | -1.584              |         |
|                        | Slovenia | 75+ y <sup>b</sup>   | 0.000                | 0.000              | 0.000               | 0.000                | 0.000                                         | 0.000               | 0.000               | 0.000               | 0.000               | 0.000               |         |
|                        |          | 18-24 y <sup>b</sup> | -0.231               | -0.144             | -0.212              | -0.170 <sup>e</sup>  | -0.160 <sup>e</sup>                           | -0.048 <sup>e</sup> | -0.035              | 0.108               | 0.027               | 0.334 <sup>e</sup>  |         |
|                        |          | 25-34 y <sup>b</sup> | -0.190               | -0.124             | -0.129 <sup>e</sup> | -0.056 <sup>e</sup>  | -0.117 <sup>e</sup>                           | -0.070 <sup>e</sup> | -0.068 <sup>e</sup> | 0.068 <sup>e</sup>  | -0.004 <sup>e</sup> | -3.210 <sup>e</sup> |         |
|                        |          | 35-44 y <sup>b</sup> | -0.172 <sup>e</sup>  | -0.074             | -0.138 <sup>e</sup> | -0.062 <sup>e</sup>  | -0.181 <sup>e</sup>                           | -0.062 <sup>e</sup> | -0.055 <sup>e</sup> | 0.073 <sup>e</sup>  | 0.007 <sup>e</sup>  | -1.400              |         |
|                        |          | 45-54 y <sup>b</sup> | -0.110 <sup>e</sup>  | -0.037             | -0.045 <sup>e</sup> | -0.018 <sup>e</sup>  | -0.128                                        | -0.082 <sup>e</sup> | -0.082 <sup>e</sup> | 0.040 <sup>e</sup>  | -0.015 <sup>e</sup> | -0.466              |         |
|                        |          | 55-64 y <sup>b</sup> | -0.115 <sup>e</sup>  | 0.042              | -0.114 <sup>e</sup> | 0.012                | -0.046                                        | -0.102 <sup>e</sup> | -0.082 <sup>e</sup> | 0.024 <sup>e</sup>  | -0.035 <sup>e</sup> | -6.965              |         |
|                        |          |                      | 65-74 y <sup>b</sup> | 0.008 <sup>e</sup> | 0.085               | 0.197 <sup>e</sup>   | 0.035                                         | 0.036               | -0.065 <sup>e</sup> | -0.124 <sup>e</sup> | -0.044 <sup>e</sup> | -0.074 <sup>e</sup> | -5.089  |
|                        |          |                      | 75+ y <sup>b</sup>   | 0.000              | 0.000               | 0.000                | 0.000                                         | 0.000               | 0.000               | 0.000               | 0.000               | 0.000               |         |
|                        |          | Const                |                      | 0.273*             | 0.144*              | 0.218*               | 0.580*                                        | 0.420*              | 0.862*              | 0.750*              | 0.722*              | 0.753*              | 70.438* |
|                        |          | R <sup>2</sup>       |                      | 0.209              | 0.157               | 0.180                | 0.171                                         | 0.072               | 0.169               | 0.190               | 0.243               | 0.211               | 0.249   |
|                        |          | F <sub>29,6896</sub> |                      | 59.819             | 19.462              | 40.488               | 62.943                                        | 19.590              | 40.537              | 49.125              | 75.394              | 59.825              | 76.035  |
|                        |          | p=                   |                      | 0.000              | 0.000               | 0.000                | 0.000                                         | 0.000               | 0.000               | 0.000               | 0.000               | 0.000               | 0.000   |

\*p<0.05 using robust standard errors, <sup>a</sup>base level: Hungary low education, <sup>b</sup>base level: Hungary <sup>c</sup>base level: Hungary male gender, <sup>d</sup>base level: Hungary 18-24 y age group, <sup>e</sup>p<0.05, base level: Poland

<sup>f</sup>Wald tests for education main effect: mobility (p<0.000), self-care(p=0.0083), usual activities (p<0.000), pain/discomfort (p<0.000), anxiety/depression (p<0.000), Polish TTO (p<0.000), UK TTO (p<0.000), European VAS (p<0.000), Slovenian VAS (p<0.000), EQ VAS (p<0.000). Education-country interaction: mobility (p=0.0013), self-care(p=0.093), usual activities (p=0.0007), pain/discomfort (p<0.0011), anxiety/depression (p<0.0654), Polish TTO (p=0.0001), UK TTO (p=0.0001), European VAS (p=0.0006), Slovenian VAS (p=0.0004), EQ VAS (p=0.0004).

<sup>g</sup>Wald tests for gender main effect: mobility (p<0.0375), self-care(p=0.613), usual activities (p<0.0071), pain/discomfort (p<0.000), anxiety/depression (p<0.000), Polish TTO (p=0.0001), UK TTO (p<0.000), European VAS (p<0.000), Slovenian VAS (p<0.000), EQ VAS (p=0.627). Gender-country interaction: mobility (p=0.15), self-care(p=0.75), usual activities (p<0.48), pain/discomfort (p<0.49), anxiety/depression (p<0.0243), Polish TTO (p=0.089), UK TTO (p=0.0779), European VAS (p=0.0572), Slovenian VAS (p=0.0556), EQ VAS (p=0.16).

<sup>h</sup>Wald test for age main effect: mobility (p<0.000), self-care(p=0.0105), usual activities (p<0.000), pain/discomfort (p<0.000), anxiety/depression (p=0.0583), Polish TTO (p<0.000), UK TTO (p<0.000), European VAS (p<0.000), Slovenian VAS (p<0.000), EQ VAS (p<0.000). Age-country interaction: mobility (p<0.000), self-care(p=0.000), usual activities (p<0.000), pain/discomfort (p<0.000), anxiety/depression (p<0.000), Polish TTO (p<0.000), UK TTO (p<0.000), European VAS (p<0.000), Slovenian VAS (p<0.000), EQ VAS (p<0.000).
