# Supplementary material for: Towards a Central-Eastern European EQ-5D-3L population norm: comparing data from Hungarian, Polish and Slovenian population studies
Source: Springer Nature journal article supplement (doi:10.1007/s10198-019-01071-0), 2019-05-17

**Towards a Central-Eastern European EQ-5D-3L Population Norm: Comparing Data from Hungarian, Polish and Slovenian Population Studies**

Zsombor Zrubka, Dominik Golicki, Valentina Prevolnik-Rupel, Petra Baji, Fanni Rencz, Valentin Brodsky, László Gulácsi, Márta Péntek

**Correspondence:** Zsombor Zrubka, Department of Health Economics Corvinus University of Budapest, Fővám tér 8., H-1093 Budapest, Hungary e-mail: [zsombor.zrubka@uni-corvinus.hu](mailto:zsombor.zrubka@uni-corvinus.hu) ; phone: +36-1-482-5308

**Journal:** The European Journal of Health Economics

**Supplementary Figure S4 Effect of different weighting strategies on EQ-5D-3L index population norm estimates**

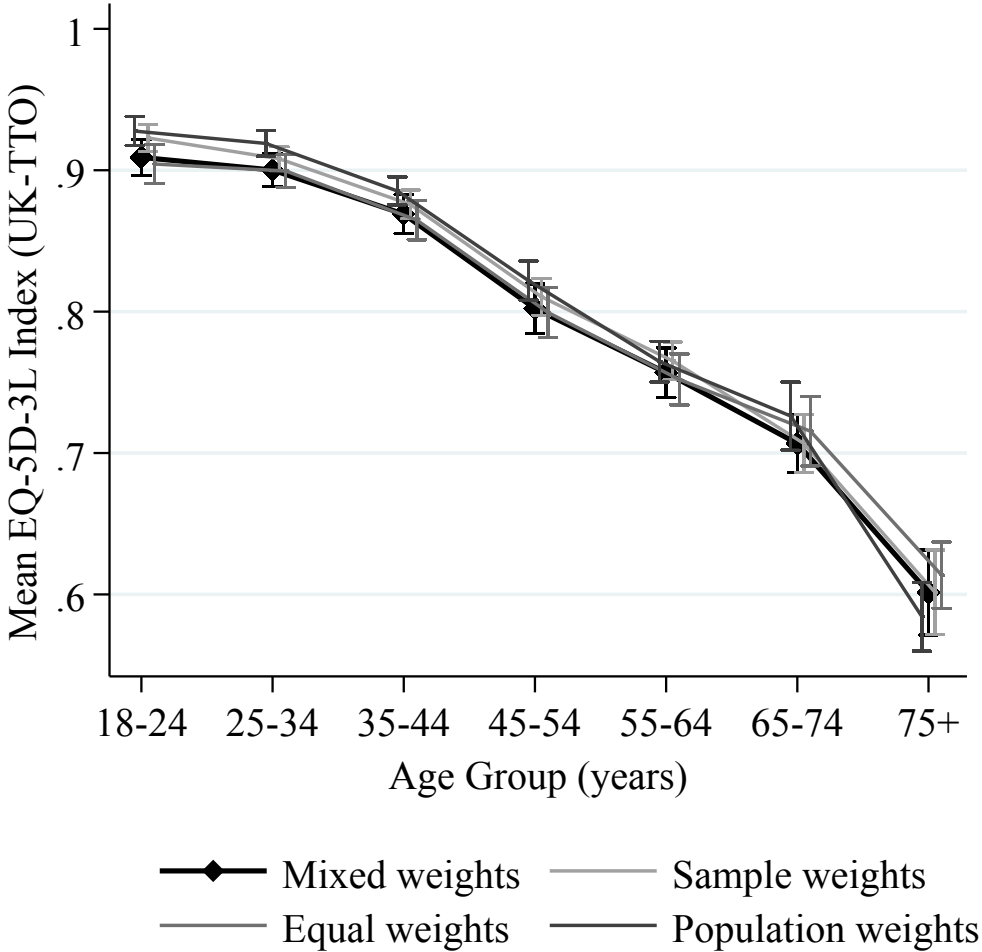

Supplement: MOESM4 [file 16731594]
